# Supplementary material
Source: publisher site journal article supplement (https://www.dovepress.com/article/373222)
Supplement: Supplementary file 1 [file get_supplementary_file.php]

**Supplementary Table 1.** List of typical and atypical antipsychotics

| Typical antipsychotic | | Atypical antipsychotic | |
| --- | --- | --- | --- |
| Oral | LAI | Oral | LAI |
| Bromperidol | LAI Haloperidol | Amisulpride | LAI Aripiprazole |
| Chlorpromazine |  | Aripiprazole | LAI Paliperidonea |
| Chlorprothixene |  | Blonanserin | LAI Risperidone |
| Haloperidol |  | Clozapine |  |
| Levomepromazine |  | Olanzapine |  |
| Molindone |  | Paliperidone |  |
| Nemonapride |  | Quetiapine |  |
| Perphenazine |  | Risperidone |  |
| Pimozide |  | Sulpiride |  |
| Thiothixene |  | Ziprasidone |  |
| Trifluoperazine |  | Zotepine |  |

LAI: long-acting injectable

a includes paliperidone palmitate monthly injection (Invega Sustenna) and 3-month injection (Invega Trinza)
